# Supplementary material
Source: PubMed Central journal article supplement (PMC5842108)
Supplement: NIHMS923971-supplement-supplement_1.pdf [file NIHMS923971-supplement-supplement_1.pdf]

**Table S1.** Classes of chromatin modification enzymes examined in this study.

| DNA Methyltransferases                                   |              |              |               |               |               |          |                |              |
|----------------------------------------------------------|--------------|--------------|---------------|---------------|---------------|----------|----------------|--------------|
| DNMT1                                                    | DNMT3A       | DNMT3B       |               |               |               |          |                |              |
| DNA & Histone Demethylases                               |              |              |               |               |               |          |                |              |
| KDM1A (KDM1) (LSD1)                                      | KDM5B        | KDM5C        | KDM4A         | KDM4C         | KDM6B (JmjD3) | MBD2     |                |              |
| Histone Acetyltransferases                               |              |              |               |               |               |          |                |              |
| ATF2 (CREB2)                                             | CDYL         | CHTA         | CSRP2BP       | ESCO1         | ESCO2         | HAT1     | KAT2A (GCN5L2) | KAT2B (PCAF) |
| KAT5                                                     | KAT8 (MYST1) | KAT7 (MYST2) | KAT6A (MYST3) | KAT6B (MYST4) | NCOA1         | NCOA3    | NCOA6          |              |
| Histone Deacetylases                                     |              |              |               |               |               |          |                |              |
| HDAC1                                                    | HDAC2        | HDAC3        | HDAC4         | HDAC5         | HDAC6         | HDAC7    | HDAC8          | HDAC9        |
| HDAC10                                                   | HDAC11       |              |               |               |               |          |                |              |
| Histone Methyltransferases                               |              |              |               |               |               |          |                |              |
| CARM1 (PRMT4)                                            | DOT1L        | EHMT2        | KMT2A         | KMT2C         | PRMT1         | PRMT2    | PRMT3          |              |
| PRMT5                                                    | PRMT6        | PRMT7        | PRMT8         | SETDB2        | SMYD3         | SUV39H1  |                |              |
| SET Domain Proteins (Histone Methyltransferase Activity) |              |              |               |               |               |          |                |              |
| ASH1L                                                    | KMT2C        | KMT2E        | NSD1          | SETD1A        | SETD1B        | SETD2    | SETD3          | SETD4        |
| SETD5                                                    | SETD6        | SETD7        | SETD8         | SETDB1        | SUV39H1       | SUV420H1 | WHSC1          |              |
| Histone Phosphorylation                                  |              |              |               |               |               |          |                |              |
| AURKA                                                    | AURKB        | AURKC        | NEK6          | PAK1          | RPS6KA3       | RPS6KA5  |                |              |
| Histone Ubiquitination                                   |              |              |               |               |               |          |                |              |
| DZIP3                                                    | MYSM1        | RNF2         | RNF20         | UBE2A         | UBE2B         | USP16    | USP21          | USP22        |

**Table S2.** Chromatin modification enzymes showing significant transcriptional alterations in periodontal disease.

| <u>Altered enzymes in periodontally-involved tissue</u>                | <u>Fold expression</u> |
|------------------------------------------------------------------------|------------------------|
| <b><u>DNA Methyltransferases</u></b>                                   |                        |
| <u>DNMT3A</u>                                                          | <u>-2.5095</u>         |
| <u>DNMT3B</u>                                                          | <u>-2.3956</u>         |
| <b><u>DNA &amp; Histone Demethylases</u></b>                           |                        |
| <u>KDM5C</u>                                                           | <u>-2.0033</u>         |
| <u>KDM6B</u>                                                           | <u>-2.6471</u>         |
| <b><u>Histone Acetyltransferases</u></b>                               |                        |
| <u>ESCO1</u>                                                           | <u>2.1489</u>          |
| <u>ESCO2</u>                                                           | <u>2.1654</u>          |
| <u>KAT2A</u>                                                           | <u>-2.933</u>          |
| <u>KAT5</u>                                                            | <u>-2.0006</u>         |
| <u>NCOA6</u>                                                           | <u>-2.3545</u>         |
| <u>CIITA</u>                                                           | <u>-2.2383</u>         |
| <u>CSRP2BP</u>                                                         | <u>-2.1176</u>         |
| <b><u>Histone Methyltransferases</u></b>                               |                        |
| <u>KMT2A</u>                                                           | <u>-2.394</u>          |
| <u>PRMT2</u>                                                           | <u>-2.044</u>          |
| <u>PRMT7</u>                                                           | <u>-2.0942</u>         |
| <u>PRMT8</u>                                                           | <u>-9.059</u>          |
| <b><u>SET Domain Proteins (Histone Methyltransferase Activity)</u></b> |                        |
| <u>SETD4</u>                                                           | <u>2.4176</u>          |
| <b><u>Histone Deacetylases</u></b>                                     |                        |
| <u>HDAC10</u>                                                          | <u>-3.0051</u>         |
| <u>HDAC11</u>                                                          | <u>-5.519</u>          |
| <u>HDAC4</u>                                                           | <u>-3.5318</u>         |
| <u>HDAC5</u>                                                           | <u>-2.4715</u>         |
| <u>HDAC7</u>                                                           | <u>-2.4562</u>         |
| <u>HDAC9</u>                                                           | <u>-2.5854</u>         |
| <b><u>Histone Phosphorylation</u></b>                                  |                        |
| <u>AURKB</u>                                                           | <u>2.2762</u>          |
| <u>NEK6</u>                                                            | <u>-2.3076</u>         |
| <b><u>Histone Ubiquitination</u></b>                                   |                        |
| <u>RNF20</u>                                                           | <u>-2.2711</u>         |

\* Numerical values represent fold expression level in diseased tissue versus healthy controls.

**Table S3.** Chromatin modification enzymes showing significant transcriptional alterations in *Td*-challenged PDL cells.

| Altered enzymes in <i>T. denticola</i> -challenged PDL cells        | Fold expression* |
|---------------------------------------------------------------------|------------------|
| <b>DNA Methyltransferases</b>                                       |                  |
| DNMT3B                                                              | -2.2             |
| <b>DNA &amp; Histone Demethylases</b>                               |                  |
| KDM4A                                                               | -2.24            |
| KDM4C                                                               | -2.04            |
| KDM5C                                                               | -2.1             |
| <b>Histone Acetyltransferases</b>                                   |                  |
| CSRP2BP                                                             | -2.38            |
| KAT2B                                                               | -2.67            |
| KAT6A                                                               | -2.28            |
| KAT6B                                                               | -2.07            |
| NCOA1                                                               | -2.4             |
| <b>Histone Methyltransferases</b>                                   |                  |
| EHMT2                                                               | -3.44            |
| PRMT5                                                               | -2               |
| PRMT6                                                               | -2               |
| SETDB2                                                              | -2               |
| SMYD3                                                               | -2.24            |
| SUV39H1                                                             | -2.47            |
| <b>SET Domain Proteins<br/>(Histone Methyltransferase Activity)</b> |                  |
| SETD2                                                               | -2.06            |
| SETD8                                                               | -2.43            |
| SETDB1                                                              | -2.21            |
| SUV420H1                                                            | -2.05            |
| WHSC1                                                               | -2.04            |
| <b>Histone Deacetylases</b>                                         |                  |
| HDAC10                                                              | -2.09            |
| HDAC4                                                               | -2.43            |
| HDAC6                                                               | -2.03            |
| <b>Histone Phosphorylation</b>                                      |                  |
| AURKB                                                               | -5.57            |
| <b>Histone Ubiquitination</b>                                       |                  |
| RNF20                                                               | -2.09            |
| USP22                                                               | -2.04            |

\* Numerical values represent fold expression level in challenged versus control PDL cells.
